# Supplementary material for: An Integration of Genome-Wide Association Study and Gene Co-expression Network Analysis Identifies Candidate Genes of Stem Lodging-Related Traits in Brassica napus
Source: Front Plant Sci. 2018 Jun 12;9:796. doi: 10.3389/fpls.2018.00796 (PMC6006280; doi:10.3389/fpls.2018.00796)
Supplement: TABLE S7 — List of candidate genes for stem lodging-related traits. [file Table_7.XLSX]

## Sheet: Sheet1
Table S7. List of candidate genes for stem lodging related traits
Traits	Candidate Genes	Position	Gene name	Homologue	Gene annotation	RNA-seq
SBR	BnaA03g47330D	chrA03:24243947-24244747	TBL18	AT4G25360.2	TRICHOME BIREFRINGENCE-LIKE 18
	BnaA03g47400D	chrA03:24299823-24301224	GA20OX1	AT4G25420.1	2-oxoglutarate (2OG) and Fe(II)-dependent oxygenase superfamily protein
	BnaA05g15310D	chrA05:9766228-9769085	4CL1	AT1G51680.1	4-coumarate:CoA ligase 1
	BnaA05g16350D	chrA05:11038479-11041821	CSLD6	AT1G32180.1	cellulose synthase-like D6
	BnaA07g34120D	chrA07:23274076-23277620	TSD2	AT1G78240.2	S-adenosyl-L-methionine-dependent methyltransferases superfamily protein
	BnaA07g34230D	chrA07:23336022-23343787	TPS1	AT1G78580.1	trehalose-6-phosphate synthase
	BnaA08g11640D	chrA08:10507281-10508723	CCoAOMT1	AT4G34050.1	S-adenosyl-L-methionine-dependent methyltransferases superfamily protein
	BnaA08g11820D	chrA08:10610915-10616064	PGSIP3	AT4G33330.1	plant glycogenin-like starch initiation protein 3
	BnaA08g11860D	chrA08:10628473-10636559	PME44	AT4G33220.1	pectin methylesterase 44
	BnaA08g25690D	chrA08:17614066-17616064	XTH33	AT1G10550.1	xyloglucan:xyloglucosyl transferase 33
	BnaA09g06280D	chrA09:3103805-3105702	DOF5.6	AT5G62940.1	Dof-type zinc finger DNA-binding family protein
	BnaA09g06870D	chrA09:3343384-3345267	XND1	AT5G64530.1	xylem NAC domain 1
	BnaA09g06900D	chrA09:3355018-3358442	XYL4	AT5G64570.1	beta-D-xylosidase 4
	BnaA09g06930D	chrA09:3369120-3369651	C/VIF2	AT5G64620.1	cell wall / vacuolar inhibitor of fructosidase 2
	BnaA09g06990D	chrA09:3400165-3406297	CESA6	AT5G64740.1	cellulose synthase 6
	BnaA10g24260D	chrA10:15868392-15871134	TBR	AT5G06700.1	Plant protein of unknown function (DUF828)
	BnaC02g41550D	chrC02:44401684-44405138	PAE9	AT5G23870.1	Pectinacetylesterase family protein
	BnaC04g47040D	chrC04:46150976-46153015	TBL33	AT2G40320.1	TRICHOME BIREFRINGENCE-LIKE 33
	BnaC04g47480D	chrC04:46435904-46438350	CYP98A3	AT2G40890.1	cytochrome P450, family 98, subfamily A, polypeptide 3
	BnaC04g47620D	chrC04:46603627-46605631	BOP2	AT2G41370.1	Ankyrin repeat family protein / BTB/POZ domain-containing protein
	BnaC04g47880D	chrC04:46761087-46763266	ADPG2	AT2G41850.1	polygalacturonase abscission zone A. thaliana
	BnaC08g26400D	chrC08:27804077-27805356	EXPA16	AT3G55500.1	expansin A16
	BnaC08g26920D	chrC08:28138816-28141341	ESK1/TBL29	AT3G55990.1	Plant protein of unknown function (DUF828)
	BnaC08g26930D	chrC08:28142536-28144702	CSLA14	AT3G56000.1	cellulose synthase like A14
SD	BnaA04g14630D	chrA04:12319529-12321570	ARF3	AT2G24765.1	ADP-ribosylation factor 3
	BnaA08g07050D	chrA08:7092380-7094744	BRX	AT1G31880.1	DZC (Disease resistance/zinc finger/chromosome condensation-like region) domain containing protein
	BnaA08g07680D	chrA08:7599616-7602963	AFH14	AT1G31810.1	Formin Homology 14
	BnaA08g11820D	chrA08:10610915-10616064	PGSIP3	AT4G33330.1	plant glycogenin-like starch initiation protein 3
	BnaA08g11860D	chrA08:10628473-10636559	PME44	AT4G33220.1	pectin methylesterase 44
	BnaA10g16550D	chrA10:12545828-12549240	APY2	AT5G18280.1	apyrase 2
	BnaC01g01290D	chrC01:597810-600339	ANT	AT4G37750.1	Integrase-type DNA-binding superfamily protein	SHvsSL_up
	BnaC03g66570D	chrC03:56307784-56308645	MYB69	AT4G33450.1	myb domain protein 69
	BnaC03g66680D	chrC03:56373990-56375617	PGSIP3	AT4G33330.1	plant glycogenin-like starch initiation protein 3
	BnaC03g66720D	chrC03:56397384-56403687	PME44	AT4G33220.1	pectin methylesterase 44
	BnaC06g31870D	chrC06:32255844-32259975	GH9B1	AT1G70710.1	glycosyl hydrolase 9B1
	BnaC08g26760D	chrC08:28049934-28051719	EPC1	AT3G55830.1	Nucleotide-diphospho-sugar transferases superfamily protein
	BnaC08g26400D	chrC08:27804077-27805356	EXPA16	AT3G55500.1	expansin A16
	BnaC08g26920D	chrC08:28138816-28141341	ESK1/TBL29	AT3G55990.1	Plant protein of unknown function (DUF828)
	BnaC08g26930D	chrC08:28142536-28144702	CSLA14	AT3G56000.1	cellulose synthase like A14
	BnaC08g36050D	chrC08:33540863-33543268	LAX2	AT2G21050.1	like AUXIN RESISTANT 2
	BnaC08g36570D	chrC08:33784661-33785627	PRF1	AT2G19760.1	profilin 1
SS	BnaA02g12680D	chrA02:6824530-6828831	SHV3	AT4G26690.1	PLC-like phosphodiesterase family protein
	BnaA02g12730D	chrA02:6840696-6843687	SHV3	AT4G26690.1	PLC-like phosphodiesterase family protein	FHvsFL_down
	BnaA05g14120D	chrA05:8650866-8653002	PME1	AT1G53840.1	pectin methylesterase 1
	BnaA05g14130D	chrA05:8653950-8656296	PME2	AT1G53830.1	pectin methylesterase 2
	BnaA05g14370D	chrA05:8845567-8847542	ARF2	AT5G62000.3	auxin response factor 2	FHvsFL_down;SHvsSL_down
	BnaA06g02910D	chrA06:1774320-1776195	DIM1	AT3G19820.3	cell elongation protein / DWARF1 / DIMINUTO (DIM)
	BnaA06g04140D	chrA06:2530435-2531603	C/VIF1	AT1G47960.1	cell wall / vacuolar inhibitor of fructosidase 1
	BnaA07g32410D	chrA07:22473193-22475149	ROL5	AT2G44270.1	repressor of lrx1
	BnaA10g07740D	chrA10:6243368-6244766	GA20OX2	AT5G51810.1	gibberellin 20 oxidase 2
	BnaA10g07980D	chrA10:6528378-6531921	EYE	AT5G51430.1	conserved oligomeric Golgi complex component-related / COG complex component-related
	BnaA10g08010D	chrA10:6603674-6604599	EYE	AT5G51430.1	conserved oligomeric Golgi complex component-related / COG complex component-related
	BnaC02g23170D	chrC02:20195335-20197969	FRA2/KTN1	AT1G80350.1	P-loop containing nucleoside triphosphate hydrolases superfamily protein
	BnaC03g22200D	chrC03:12128932-12130252	EXPA4	AT2G39700.1	expansin A4
	BnaC08g26400D	chrC08:27804077-27805356	EXPA16	AT3G55500.1	expansin A16
LC	BnaA04g03540D	chrA04:2425311-2426683	EXPA16	AT3G55500.1	expansin A16
	BnaA04g23400D	chrA04:17397882-17403271	EXPA8	AT2G40610.1	expansin A8
	BnaA07g10240D	chrA07:9754758-9756438	CEL5	AT1G22880.1	cellulase 5
	BnaA07g10320D	chrA07:9796653-9798956	SUC2	AT1G22710.1	sucrose-proton symporter 2
	BnaA07g11020D	chrA07:10389640-10392054	WAK5	AT1G21230.1	wall associated kinase 5
	BnaA07g11030D	chrA07:10393267-10393774	WAK4	AT1G21210.1	wall associated kinase 4	FHvsFL_down
	BnaA07g11040D	chrA07:10393839-10395721	WAK5	AT1G21230.1	wall associated kinase 5
	BnaA07g11240D	chrA07:10535915-10537433	XCP2	AT1G20850.1	xylem cysteine peptidase 2
	BnaA07g11310D	chrA07:10568806-10570838	WOX14	AT1G20700.1	WUSCHEL related homeobox 14
	BnaA07g12000D	chrA07:11068776-11070385	IRX14L	AT5G67230.1	Nucleotide-diphospho-sugar transferases superfamily protein
	BnaA10g12200D	chrA10:10118908-10121083	RABA2D	AT5G59150.1	RAB GTPase homolog A2D
	BnaA10g12360D	chrA10:10190983-10192267	WOX2	AT5G59340.1	WUSCHEL related homeobox 2
	BnaC03g05800D	chrC03:2824957-2829093	SFC	AT5G13300.1	ARF GTPase-activating protein
	BnaC07g40380D	chrC07:40781218-40782748	TPST	AT1G08030.1	tyrosylprotein sulfotransferase
	BnaC07g40400D	chrC07:40788215-40793747	SHV3	AT4G26690.1	PLC-like phosphodiesterase family protein	FHvsFL_down
	BnaC07g40640D	chrC07:40861019-40864563	SHV3	AT4G26690.1	PLC-like phosphodiesterase family protein
