# Supplementary material for: An Integration of Genome-Wide Association Study and Gene Co-expression Network Analysis Identifies Candidate Genes of Stem Lodging-Related Traits in Brassica napus
Source: Front Plant Sci. 2018 Jun 12;9:796. doi: 10.3389/fpls.2018.00796 (PMC6006280; doi:10.3389/fpls.2018.00796)
Supplement: TABLE S8 — Primers used for qRT-PCR. [file Table_8.XLSX]

## Sheet: Sheet1
Table S8. Primers used for qRT-PCR
Candidate genes	Gene name	Primer sequence(5'-3')	Tm (°C)	Product length (bp)
BnaA02g12730D	SHV3	F: CTCGCTCTCTGAATTCCTACAC	57.7	98
		R: CTTGCTTCTCTCTCAGGTACAC	57.7
BnaA05g14370D	ARF2	F: CAATGCGACAACAGGGAAATG	55.6	95
		R: GATCTCAACGCTCCTGGTAAAG	57.7
BnaA07g11030D	WAK4	F: CTAGGCTACCTAGACCCTGAATA	57.8	99
		R: GCCTGTGAGAAGTTCCATGA	55.4
BnaC01g01290D	ANT	F: GAAGTGGTCGTTGGACAGAA	55.4	90
		R: TCTTGTAACGCCTCGGTATTG	55.6
BnaC07g40400D	SHV3	F: CAGCAGCGAAGCTTACAATTAC	55.8	113
		R: CATCCCTCCCGTTGAATAAAGA	55.8
BnaC09g46850D	ACTIN7	F: CTGGAATTGCTGACCGTATGAG	57.7	145
		R: ATCTGTTGGAAAGTGCTGAGGG	57.7
BnaA09g04490D	UBC21	F: CCTCTGCAGCCTCCTCAAGT	61.6	77
		R: CATATCTCCCCTGTCTTGAAATGC	59.5
F: forward primer; R: reverse primer; Tm: melting temperature.
